# Supplementary material for: Synthesis, characterization, and hole-transporting properties of pyrenyl N-substituted triazatruxenes
Source: Royal Society of Chemistry journal article supplement (doi:10.1039/c6ra09688c), 2016-01-01
Supplement: c6ra09688c1.pdf [file c6ra09688c1.pdf]

## Supporting Information

### **Synthesis, Characterizations, and Hole-transporting Properties of Pyrenyl N-Substituted Triazatruxenes**

Thanachart Techajaronjit<sup>1</sup>, Supawadee Namuangruk<sup>2</sup>, Narid Prachumrak<sup>3</sup>, Vinich  
Promarak<sup>3</sup>, Mongkol Sukwattanasinitt<sup>1</sup>, Paitoon Rashatasakhon<sup>1\*</sup>

<sup>1</sup> *Department of Chemistry, Faculty of Science, Chulalongkorn University, Bangkok 10330,  
Thailand*

<sup>2</sup> *National Nanotechnology Center, NSTDA, 111 Thailand Science Park, Klong Luang,  
Pathum Thani 12120, Thailand*

<sup>3</sup> *Department of Materials Science & Engineering, School of Molecular Science &  
Engineering, Vidyasirimedhi Institute of Science and Technology, Wongchan, Rayong 21210,  
Thailand*

E-mail: [paitoon.r@chula.ac.th](mailto:paitoon.r@chula.ac.th)

Tel.: +66 (2) 2187633

Fax.: +66 (2) 2187598

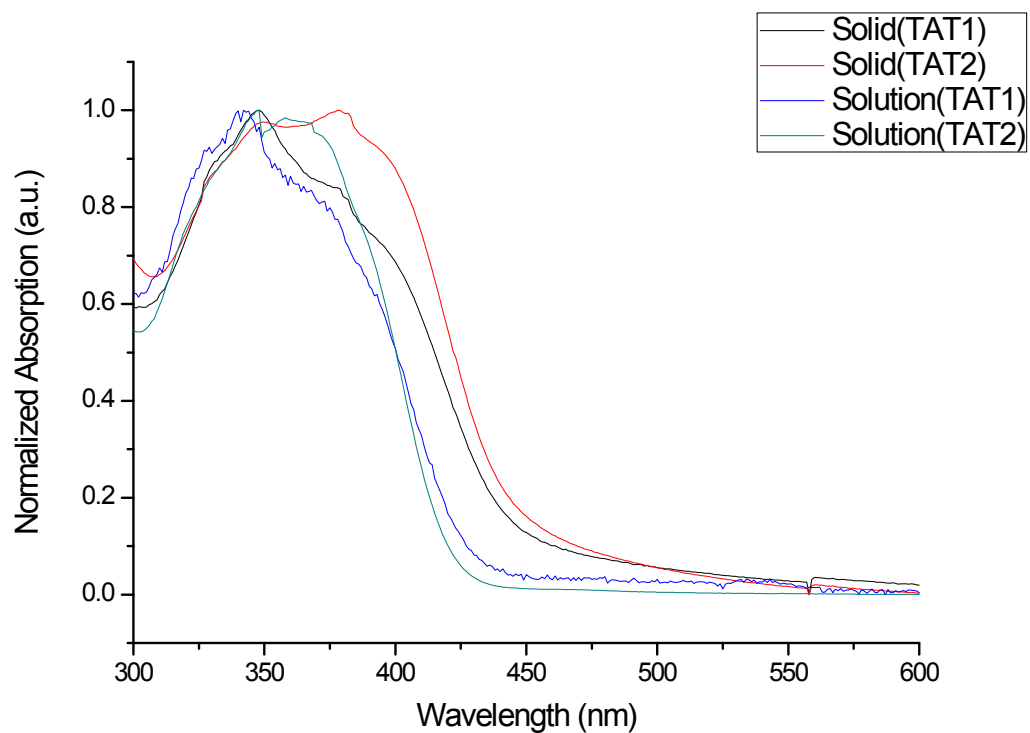

**Fig. S1** Normalized absorption spectra of **TAT1** and **TAT2** in solution phase and thin film

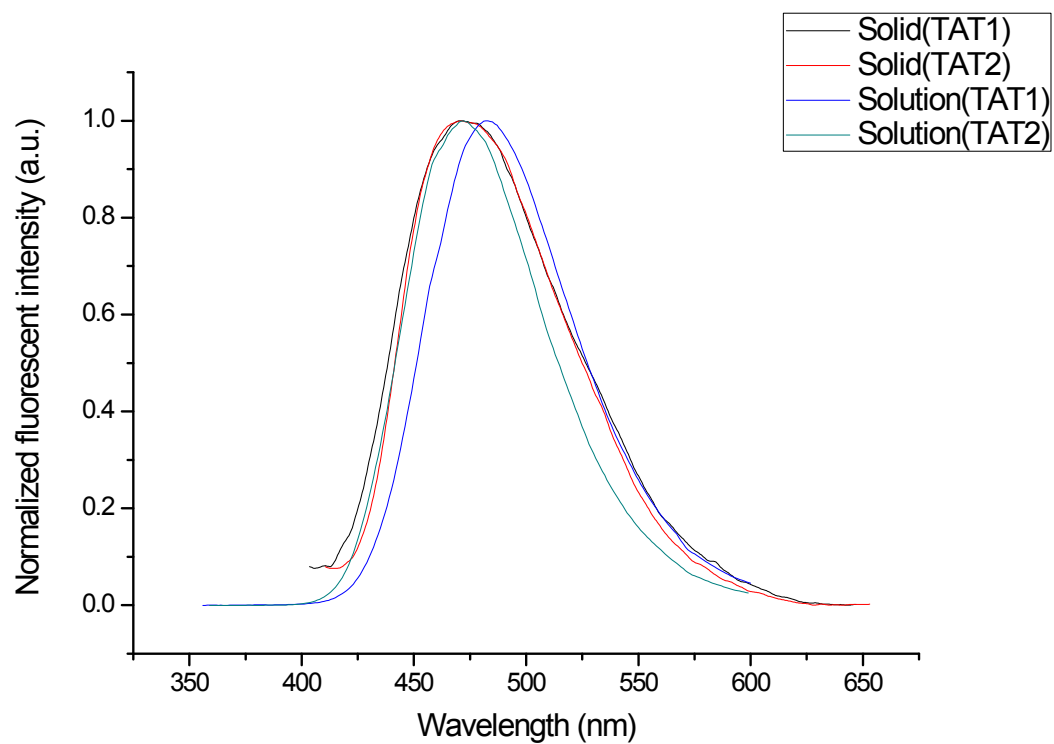

**Fig. S2** Normalized emission spectra of **TAT1** and **TAT2** in solution phase and thin film

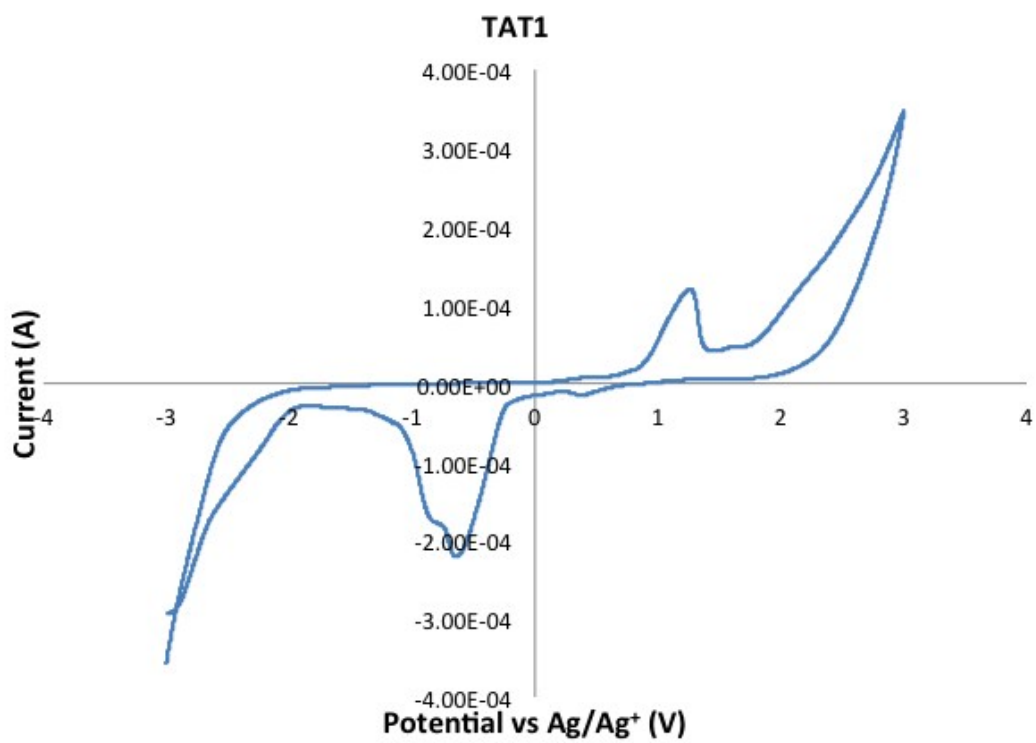

Fig. S3 Cyclic voltammogram of TAT1

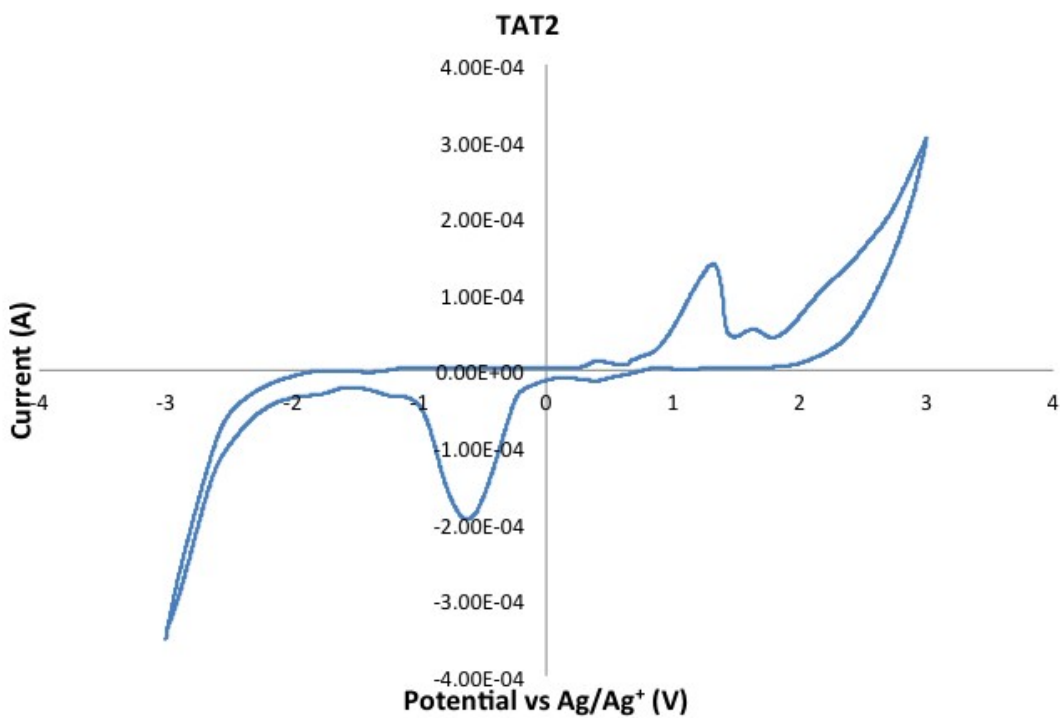

Fig. S4 Cyclic voltammogram of TAT2

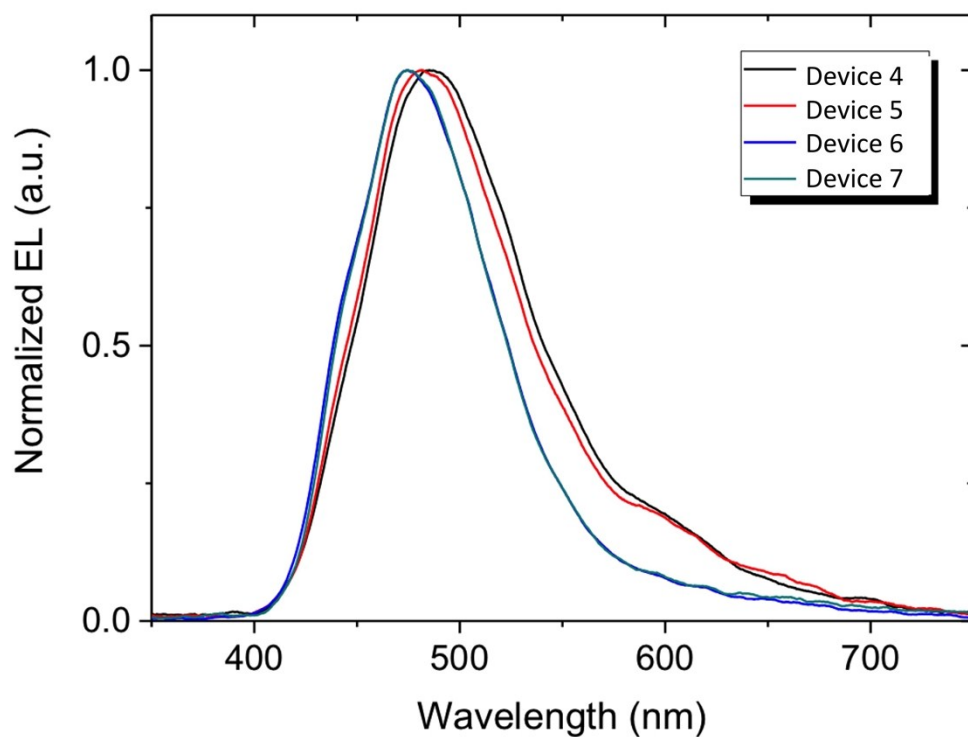

**Fig. S5.** EL spectra of Device 4-7

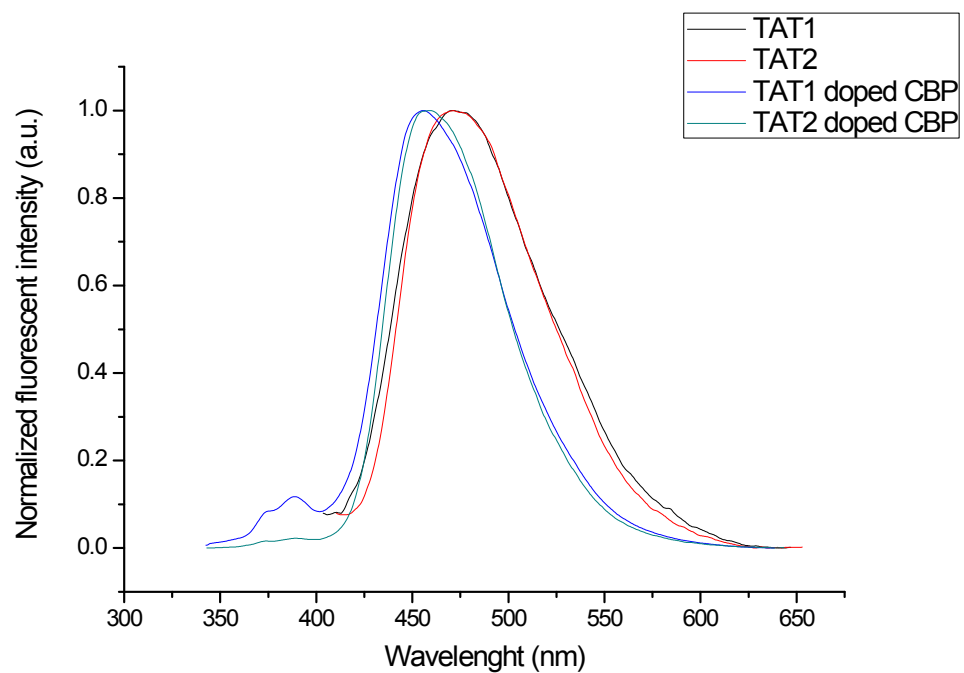

**Fig. S6.** PL spectra of TAT1, TAT2 and CBP films doped with either TAT1 or TAT2.

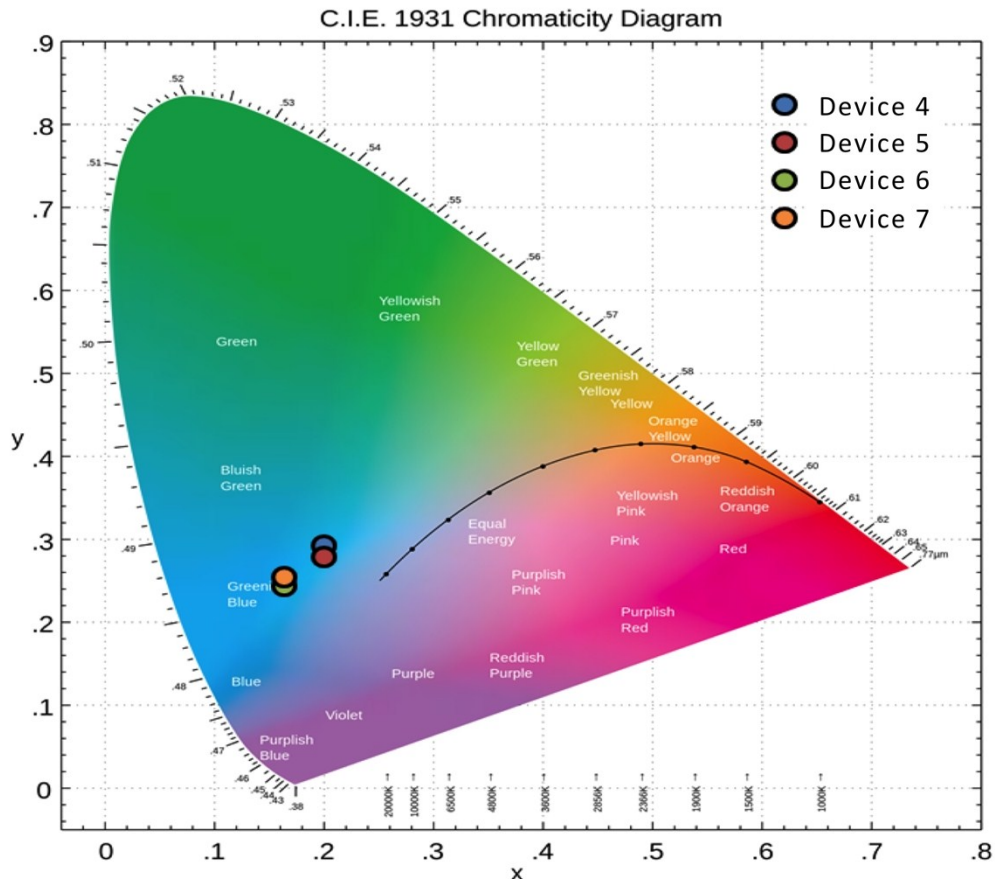

**Fig. S7.** CIE coordination (x,y) of Device 4-7.

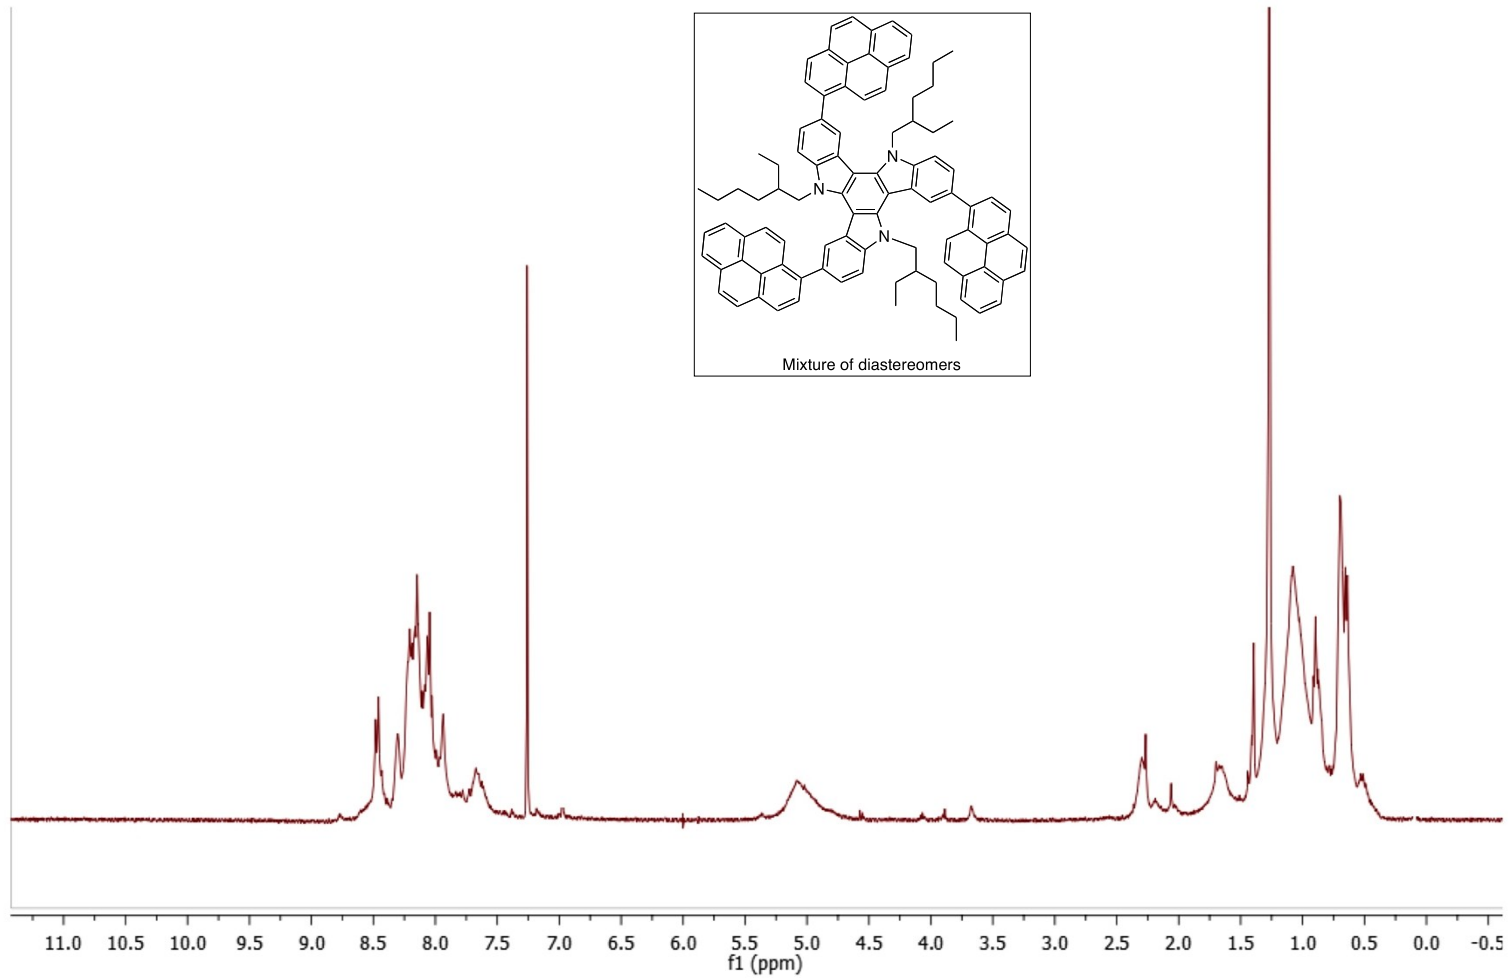

$^1\text{H-NMR}$  of **TAT1** in  $\text{CDCl}_3$

Oct10-2014-psa003  
J-PRTT-020-2-P  
chula\_carbon10k

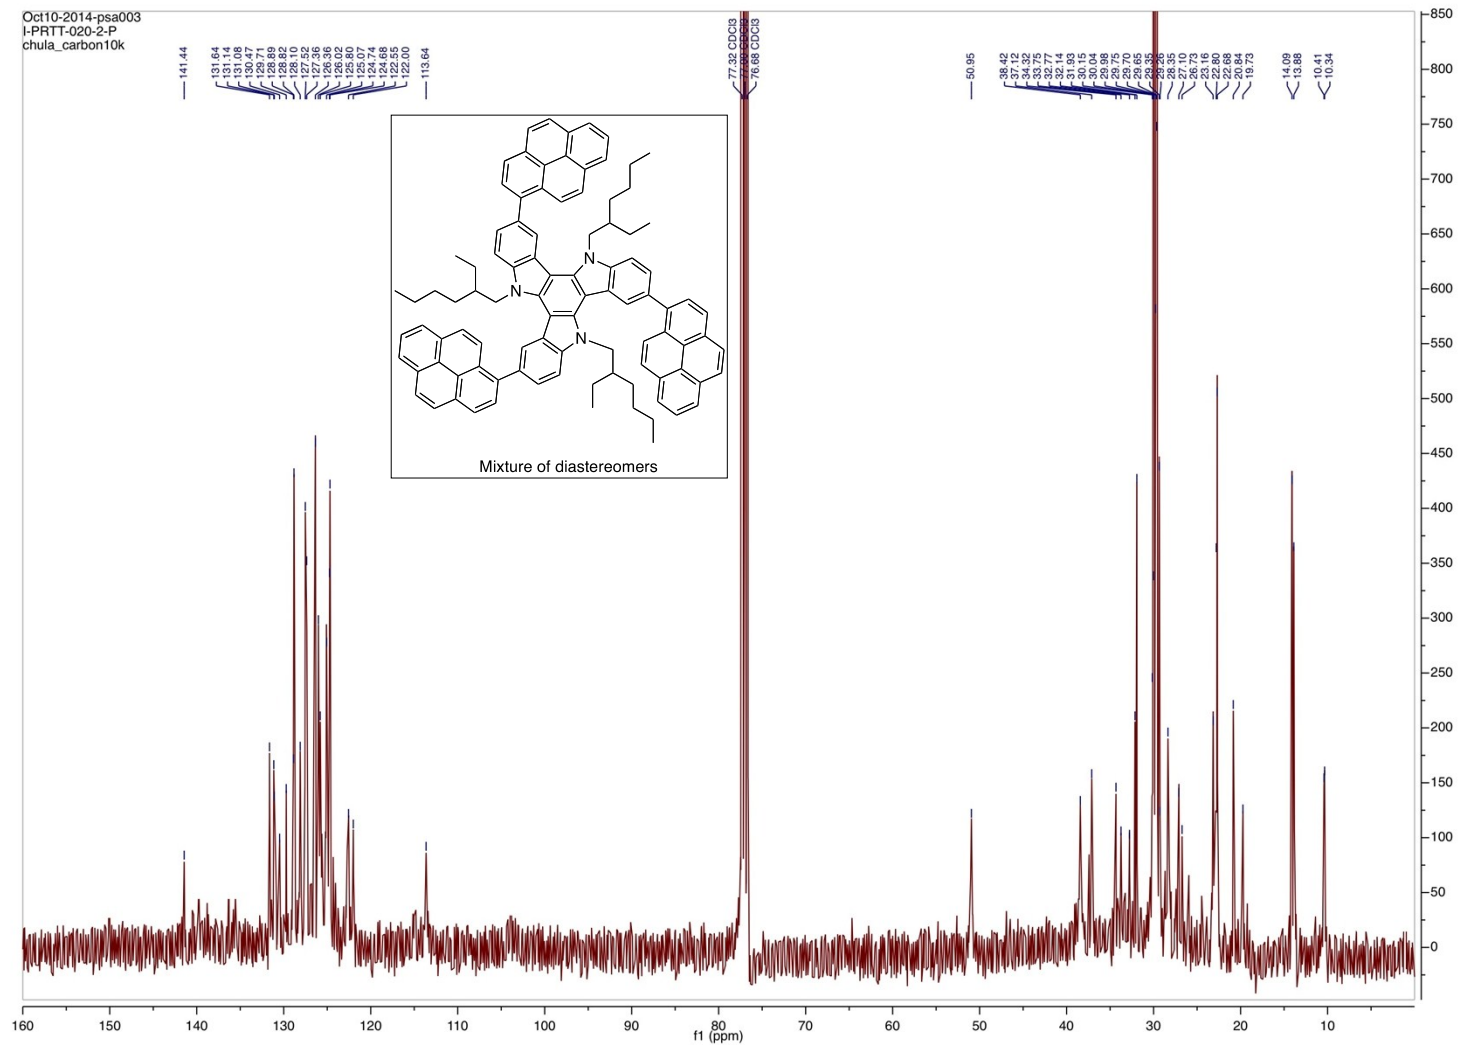

$^{13}\text{C}$ -NMR of TAT1 in  $\text{CDCl}_3$

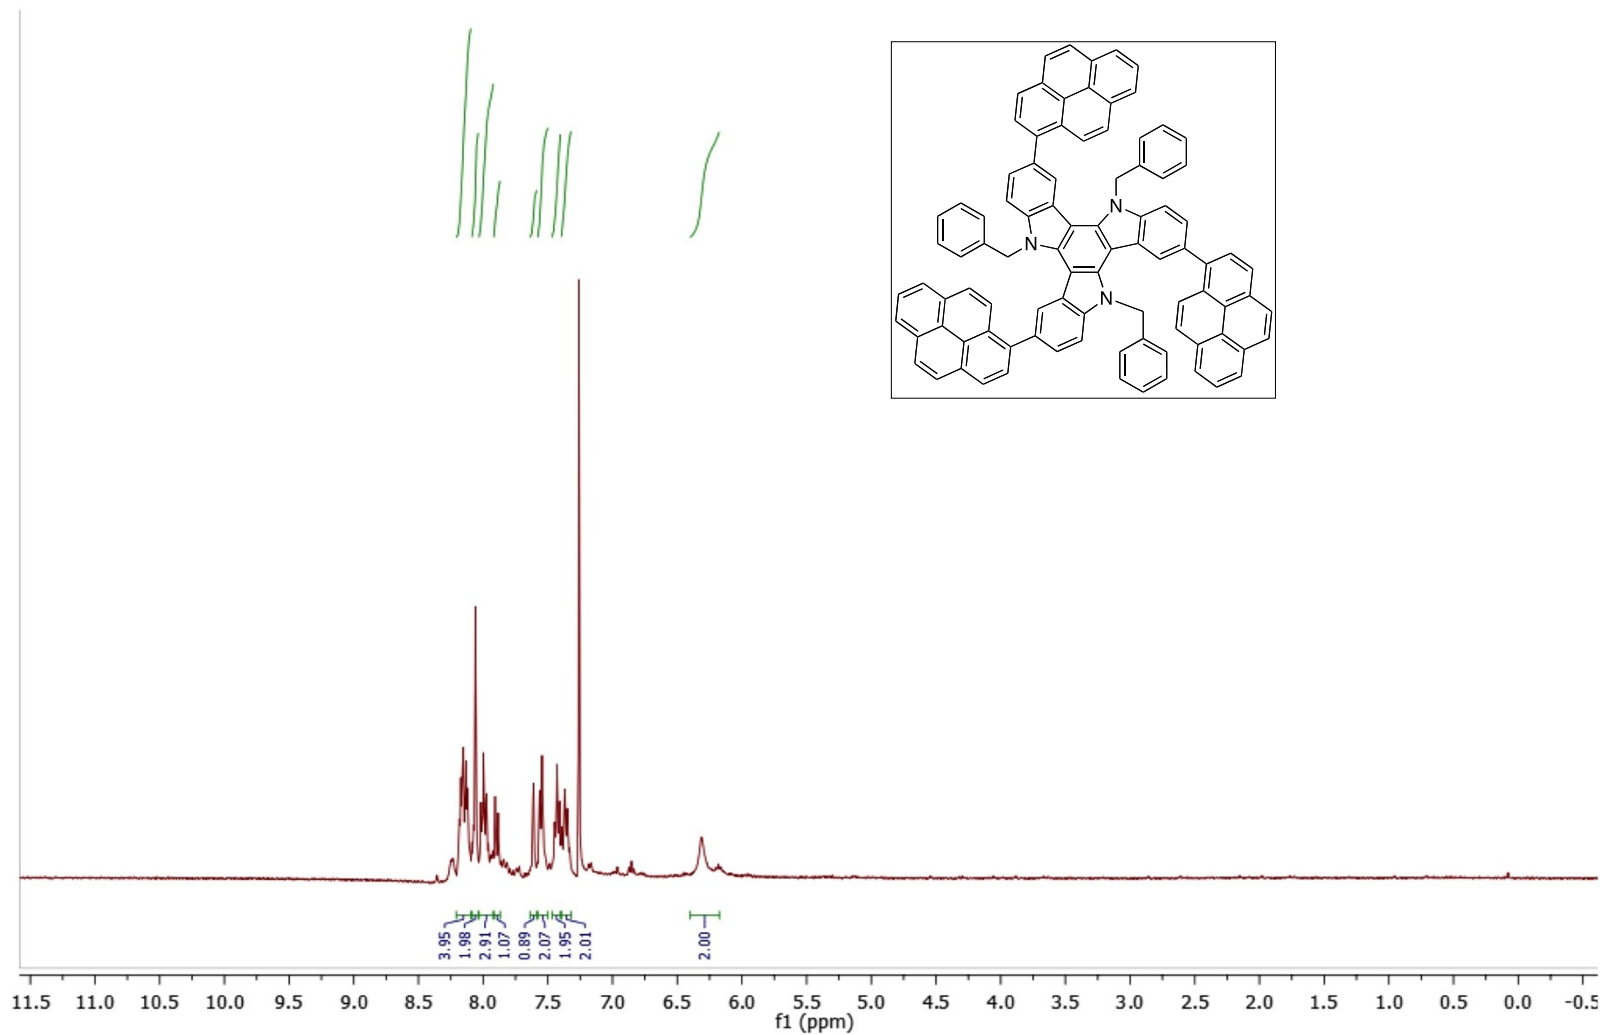

$^1\text{H-NMR}$  of TAT2 in  $\text{CDCl}_3$



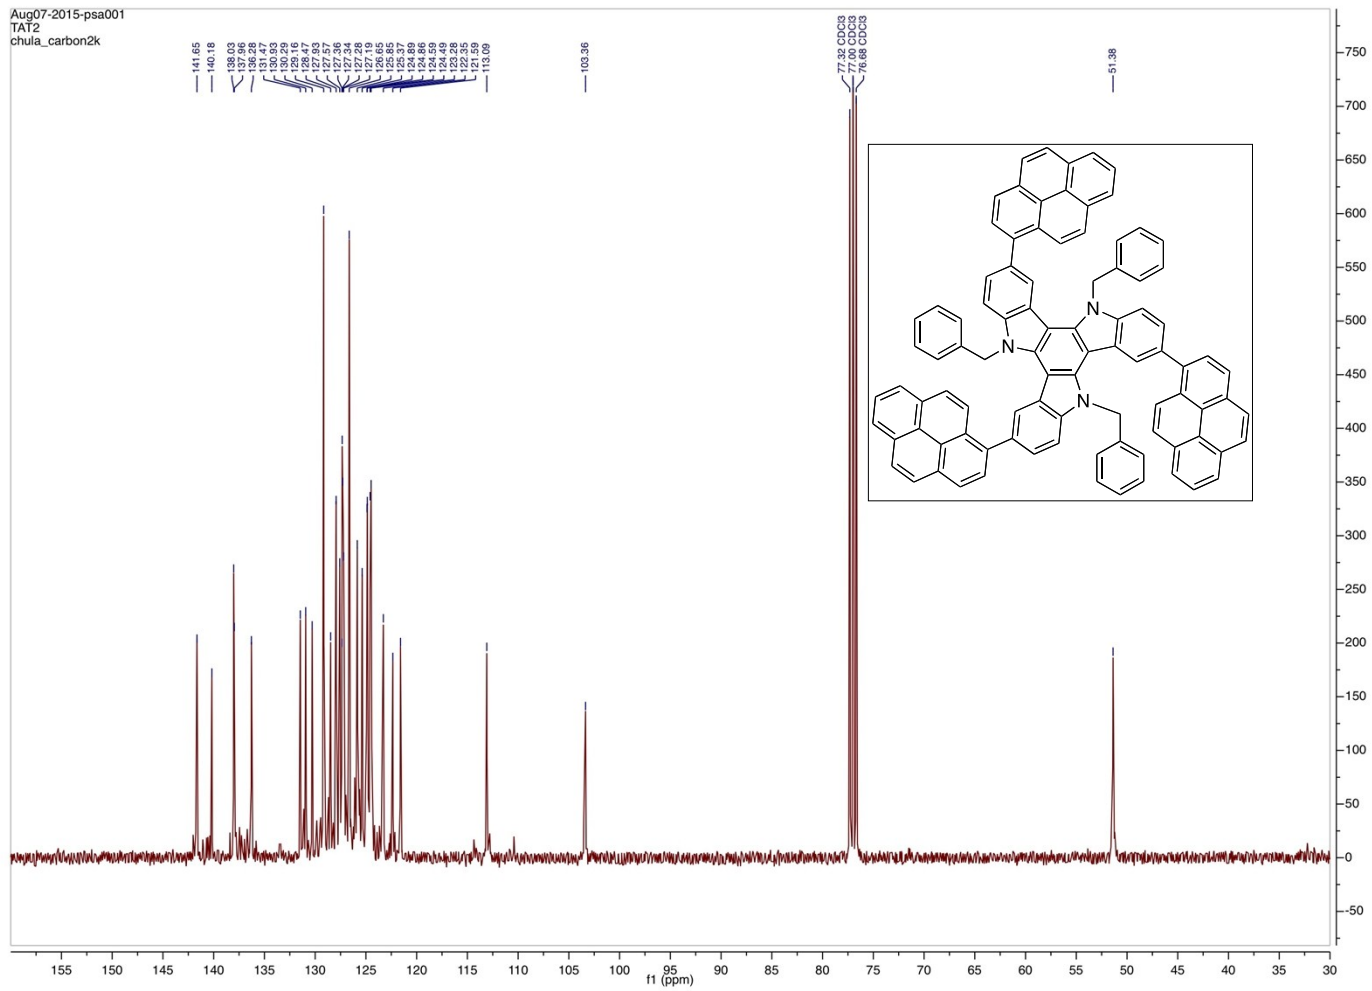

$^{13}\text{C}$ -NMR of TAT2 in  $\text{CDCl}_3$

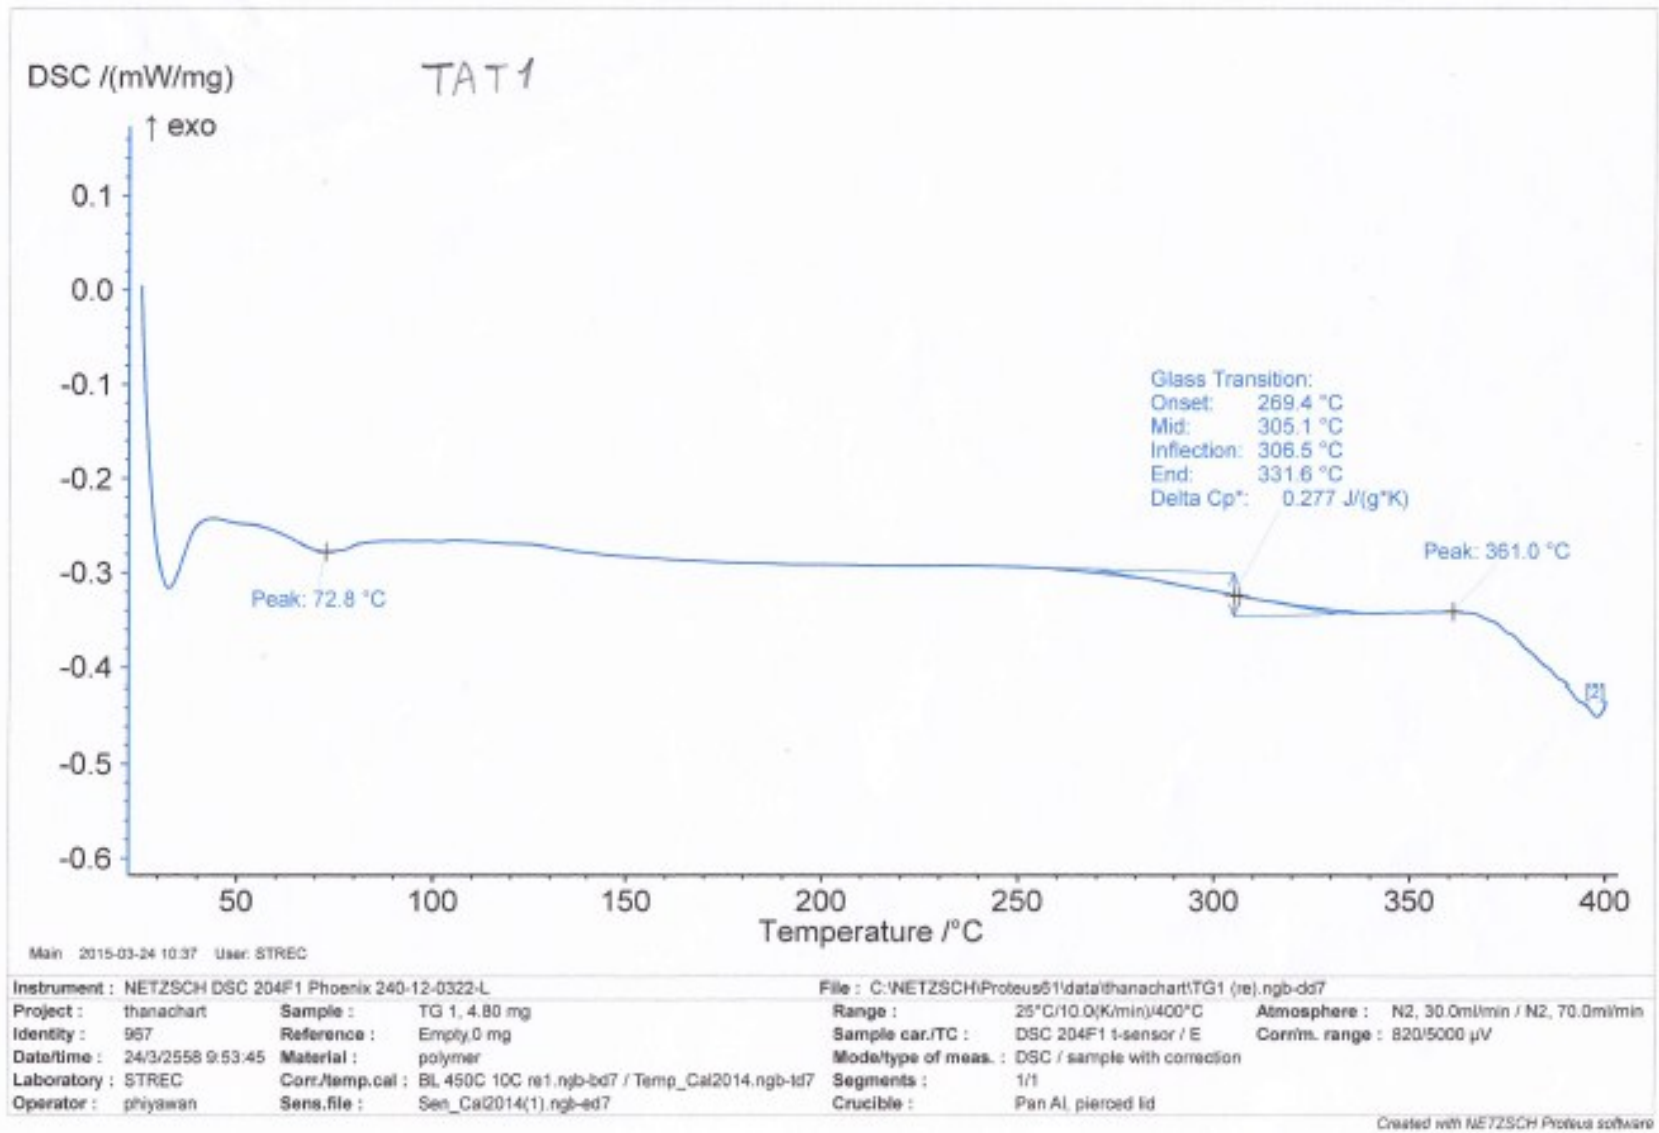

DSC Thermogram of TAT1

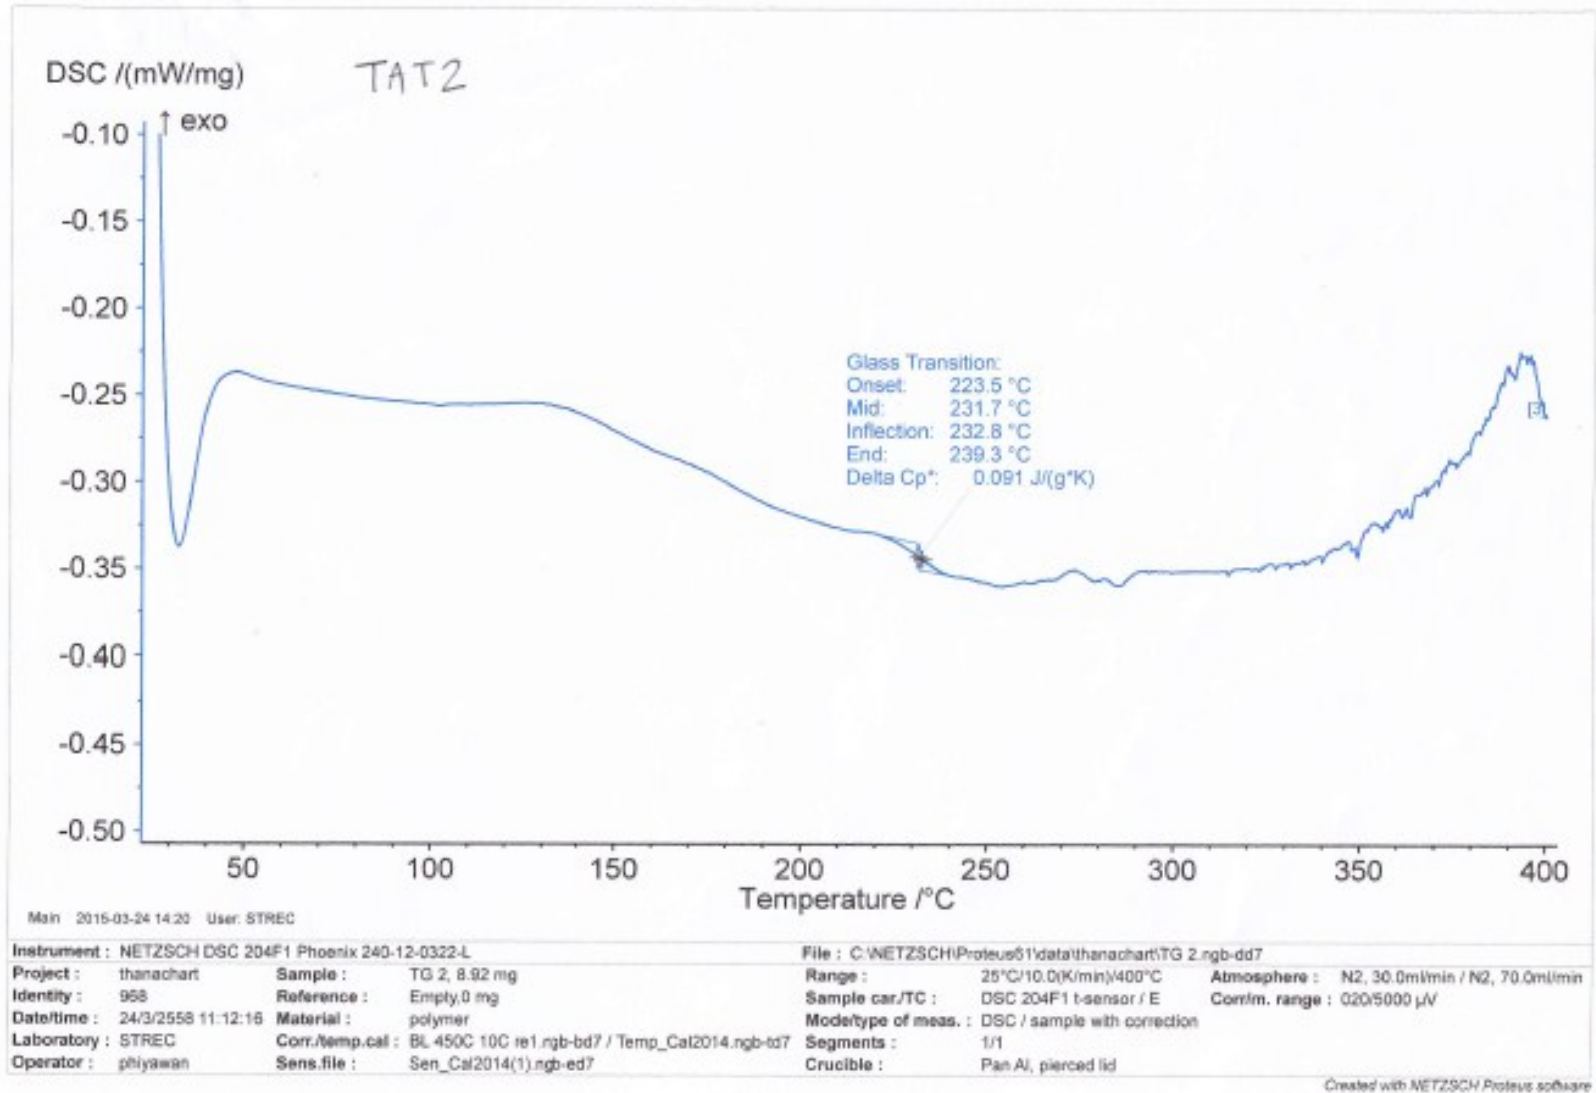

DSC Thermogram of TAT2

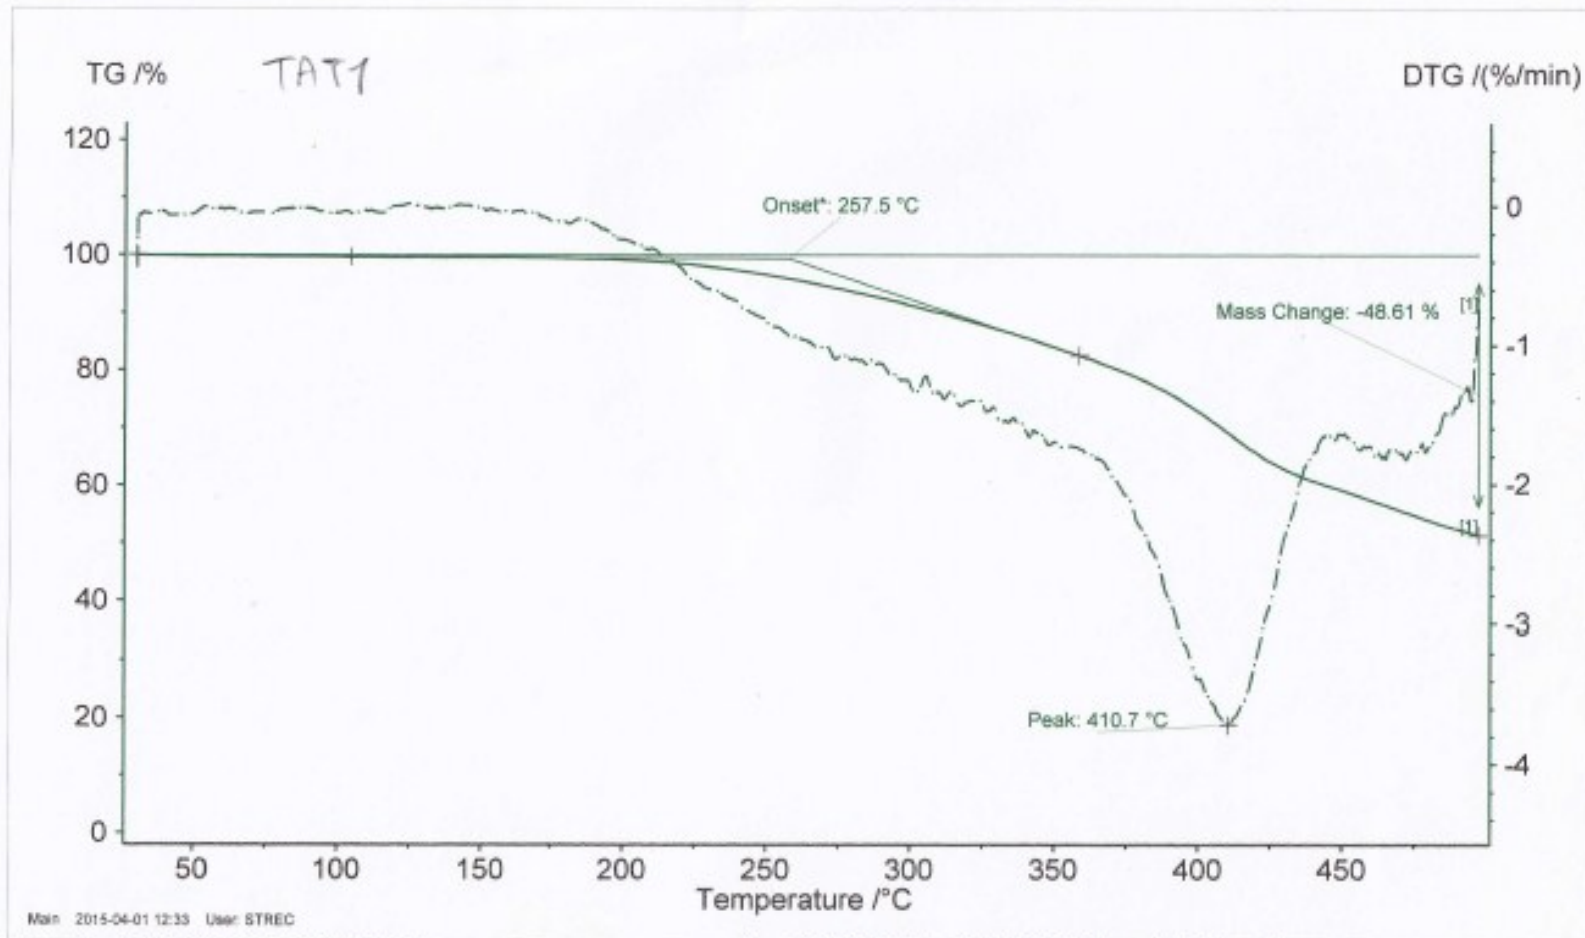

Main 2015-04-01 12:33 User: STREC

|                                                |                                              |                                                                    |                             |
|------------------------------------------------|----------------------------------------------|--------------------------------------------------------------------|-----------------------------|
| Instrument : NETZSCH TG 209F3 TGA209F3A-0364-L |                                              | File : C:\NETZSCH\Proteus61\data\DATA 2014\@hanachart\TG 1.nrb-d16 |                             |
| Project : thanachart                           | Sample : TG 1                                | Sample car/TC : TG 209F3 standard/P                                | Atmosphere : -- / N2 / N2   |
| Identity : 487                                 | Material : organic                           | Sample mass : 2.8939 mg                                            | Corr/m. range : 020/2000 mg |
| Date/time : 1/4/2558 11:41:59                  | Correction file : BL 500C 10C N2 (4).nrb-b16 | Mode/type of meas. : TG/sample with correction                     |                             |
| Laboratory : STREC                             | Temp. calib. file : Temp_Cal2014.nrb-b16     | Segments : 1/1                                                     |                             |
| Operator : phiyawan                            | Range : 28°C/10.0(K/min)/500°C               | Crucible : A/203                                                   |                             |

Created with NETZSCH Proteus software

TGA Thermogram of TAT1

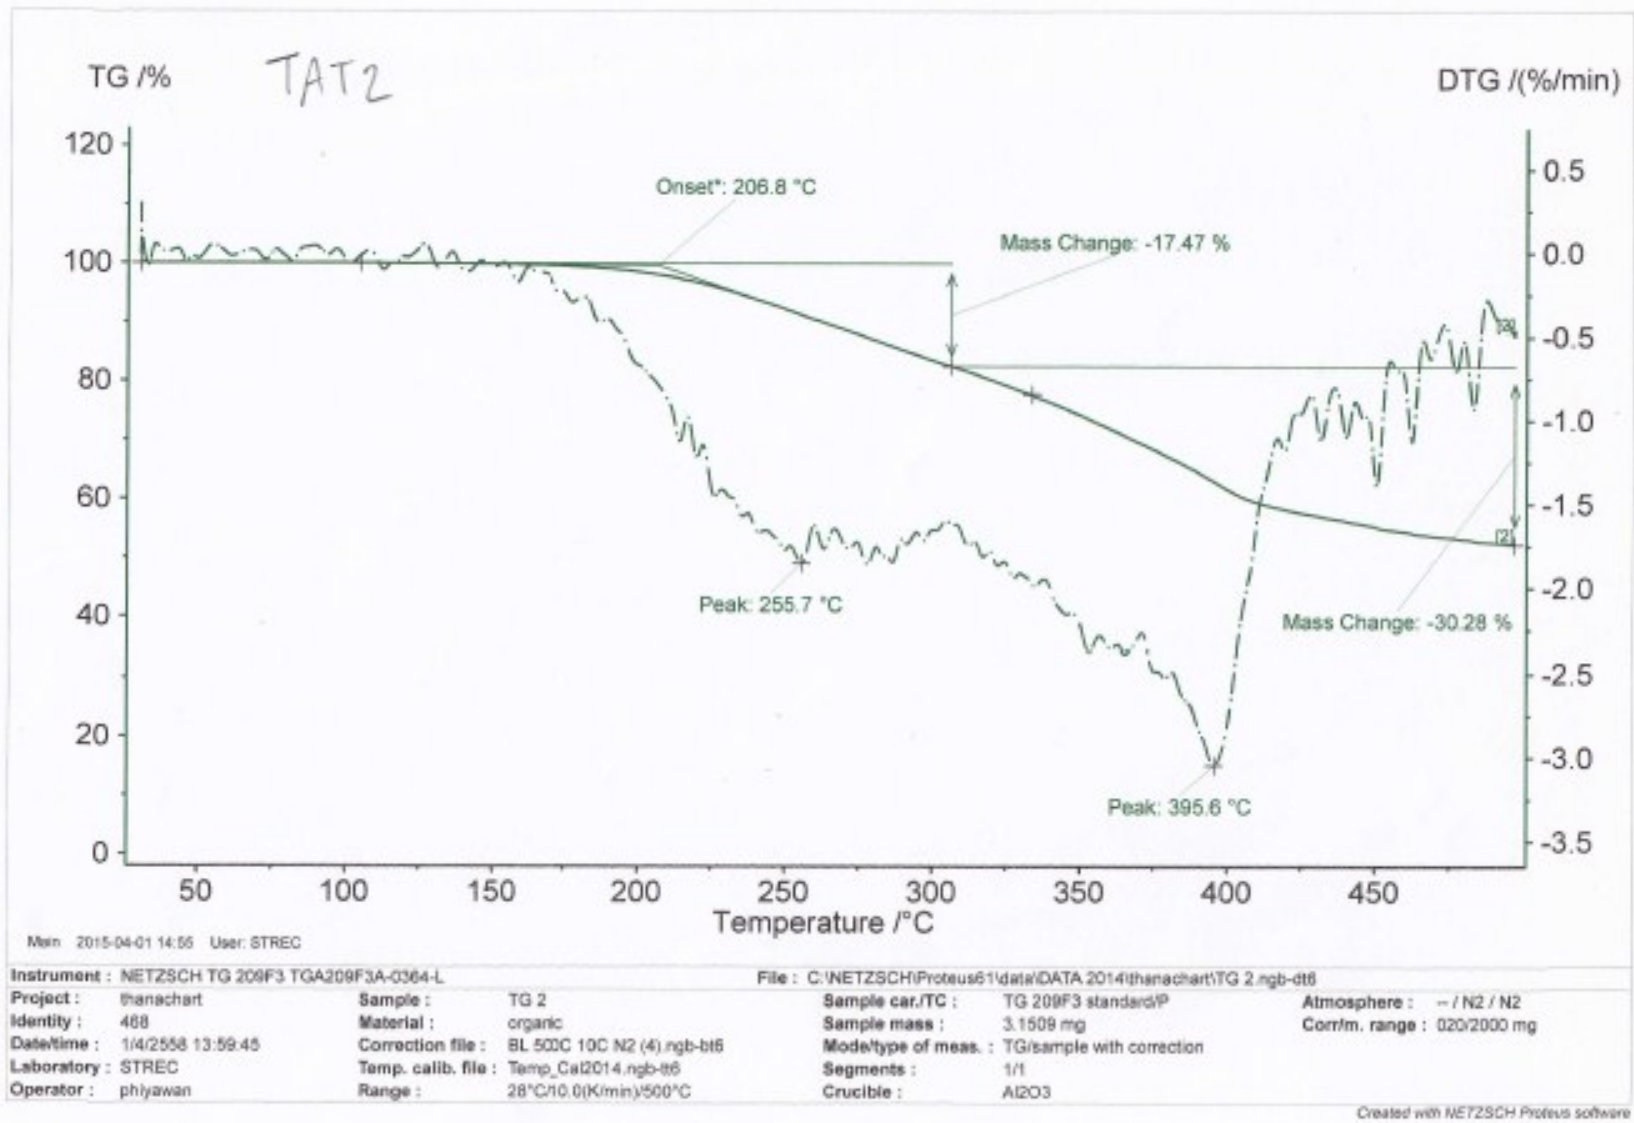

TGA Thermogram of TAT2
